# Supplementary material for: Wheat-Bran-Based Artificial Diet for Mass Culturing of the Fall Armyworm, Spodoptera frugiperda Smith (Lepidoptera: Noctuidae)
Source: MDPI journal article supplement (doi:10.3390/insects13121177), 2022-12-19
Supplement: s1 [file s1]

Table S1. Purchase price of each material in diet

| Material            | Costs per kg/500 mL<br>(RMB) |
|---------------------|------------------------------|
| Wheat bran          | 2.40                         |
| Soybean powder      | 16.00                        |
| Maize powder        | 8.00                         |
| Yeast powder        | 70.00                        |
| Agar                | 110.00                       |
| Casein              | 90.00                        |
| Sorbic acid         | 50.00                        |
| Ascorbic acid       | 27.00                        |
| Vitamins            | 4540.00                      |
| Formaldehyde        | 30.00                        |
| Glacial acetic acid | 6.00                         |

Exchange rate at time of writing: RMB 1 = USD 0.1380.

Table S2. Purchase price of each vitamin in diet.

| Material                            | Costs per g (RMB) |
|-------------------------------------|-------------------|
| Aneurine hydrochloride              | 8.00              |
| Riboflavin                          | 1.40              |
| Nicotinic acid                      | 4.00              |
| D-pantothenic acid hemicalcium salt | 3.20              |
| Pyridoxine hydrochloride            | 1.60              |
| Cyanocobalamin                      | 1.60              |
| Folic acid                          | 4.00              |
| Nicotinamide                        | 180.00            |

Exchange rate at time of writing: RMB 1 = USD 0.1380.
